# Supplementary material for: From the Atlantic Coast to Lake Tanganyika: Gill-Infecting Flatworms of Freshwater Pellonuline Clupeid Fishes in West and Central Africa, With Description of Eleven New Species and Key to Kapentagyrus (Monogenea, Dactylogyridae)
Source: Preprints.org preprint supplement (doi:10.20944/preprints202111.0033.v1), 2021-11-02
Supplement: Supplementary file 1 [file supplementary]

## Sheet: Haptor
Specimen ID	Parasite species	Host species	Accession number	Symbiotype/Symbioparatype	Locality	DA total length	DA length to notch	DA inner root length	DA outer root length	DA point length	DB branch length	DB branch maximum width	VB length	VB width	HI	HV	HII	HIII	HIV	HVI	HVII	Haverage	VA total length	VA length to notch	VA inner root length	VA outer root length	VA point length
mono1	Kapentagyrus voreli n. sp.	Odaxothrisssa ansorgii		RMCA A0-048-P-1260	Lake Nguene	37.5	28.92	NA	4.1	9.25	19.85	5.92	24.86	4.74	16.83	13.55	20.28	18.83	18.98	18.75	16.25	17.6386	37.3	27.7	17.9	NA	9.8
mono1	Kapentagyrus voreli n. sp.	Odaxothrisssa ansorgii		RMCA A1-070-P-0266	Aboun, Noya River	38.9	27.9	16.57	6.4	10.29	23.88	7.25	23.5	5.81	14.16	16.5	14.95	18.06	15.73	17.5	16.87	16.2529	36.61	27	18.79	6.7	9.7
mono1	Kapentagyrus voreli n. sp.	Odaxothrisssa ansorgii		RMCA A0-048-P-1255	Lake Nguene	38.05	28.1	17.9	5.4	9.6	21.8	6.3	23.7	9.1	16.45	17.09	18.38	18.41	17.65	NA	NA	17.596	35.2	27.3	17.6	5.3	9.6
mono2	Kapentagyrus voreli n. sp.	Odaxothrisssa ansorgii		RMCA A0-048-P-1255	Lake Nguene	35.6	28.4	14.9	4.4	10.3	20.7	6.4	23.1	8.1	NA	NA	NA	NA	NA	NA	NA	NA	35.8	27	17	4.9	9.4
mono3	Kapentagyrus voreli n. sp.	Odaxothrisssa ansorgii		RMCA A0-048-P-1252	Lake Nguene	37.1	25.32	15	5	NA	19.8	6.8	29.7	8.3	16.52	18.85	16.47	18.72	20.6	17.82	15.7	17.8114	36.4	27.8	19.19	6.8	9.3
mono1	Kapentagyrus voreli n. sp.	Odaxothrisssa ansorgii		RMCA A0-048-P-1256	Lake Nguene	38.1	28.2	15.6	4.1	7.78	23.2	7.1	27.4	10.1	14.15	17.48	17.74	19.96	20.77	13.61	13.91	16.8029	35.2	26.9	19	4.2	11.07
mono1	Kapentagyrus marispastoris n. sp.	Odaxothrissa mento		RMCA 1973.007.P.0019-1	Lake Volta	38.11	28.06	22.09	8.81	8.84	27.15	4.92	27.41	7.23	17.41	16.41	17.21	18.93	20.31	17.12	15	17.4843	38.23	25.53	19.04	10.1	10.18
mono2	Kapentagyrus sefcae n. sp.	Odaxothrisssa losera		RMCA 1977.042.P.0004	Pool Malebo	41.38	29.93	22.6	7.47	12.18	31.47	7.01	26.84	8.35	17.83	NA	NA	NA	NA	NA	NA	17.83	47.94	30.74	27.59	8.19	14.16
mono3	Kapentagyrus sefcae n. sp.	Odaxothrisssa losera		RMCA 1977.042.P.0004	Pool Malebo	36.7	28.48	19.8	6.36	11.78	29.06	7.18	25.84	6.06	11.93	NA	13.8	14.48	14.09	NA	NA	13.575	42.32	29.79	22.7	6.89	11.78
mono7	Kapentagyrus sefcae n. sp.	Odaxothrisssa losera		RMCA 1977.042.P.0004	Pool Malebo	38.59	30.11	22.53	5.9	9.62	30.35	7.03	28.46	8.33	12.97	18.5	17.3	17	15.5	17	19.7	16.8529	41.93	32.21	23.83	6.2	10.65
mono3	Kapentagyrus sefcae n. sp.	Odaxothrisssa losera		RMCA 1977.042.P.0003	Pool Malebo	38.3	28.3	21.1	5	14.8	27.9	10.4	26	8.9	NA	NA	NA	NA	NA	NA	NA	NA	44.8	31.6	25.9	7.8	11.1
mono1	Kapentagyrus sefcae n. sp.	Odaxothrisssa losera		RMCA 1977.042.P.0003	Pool Malebo	41.4	30.7	22.1	5.7	12.3	27.7	8.4	30.9	8.2	17.2	18.1	17.9	NA	18.1	18.3	17.2	17.8	44.7	33.3	27.9	7.1	12.8
mono2	Kapentagyrus sefcae n. sp.	Odaxothrisssa losera		RMCA 1977.042.P.0003	Pool Malebo	38.6	28	19.9	7.7	12.8	28.2	8.5	25.7	8.7	15.8	NA	17	19.2	18.2	NA	NA	17.55	44.5	28.2	28.7	10.5	15.6
mono9	Kapentagyrus sefcae n. sp.	Odaxothrisssa losera		RMCA 1977.042.P.0004	Pool Malebo	37.1	28.6	22.3	6.3	13.1	30	10	26.3	9.4	15	18.2	16.5	17.1	17.9	17.5	NA	17.0333	45.1	31	23.2	8	13.3
mono11	Kapentagyrus sefcae n. sp.	Odaxothrisssa losera		RMCA 1977.042.P.0004	Pool Malebo	37.5	28.8	21.2	5.6	11.6	30.5	8.4	29.3	8	15.2	15.8	16.2	17.4	14.7	17	18.4	16.3857	43.4	29.4	27.4	NA	11.1
mono13	Kapentagyrus sefcae n. sp.	Odaxothrisssa losera		RMCA 1977.042.P.0004	Pool Malebo	38.6	28.6	23.3	6	15.3	28.7	7.9	28.2	9.8	18.6	NA	18.5	NA	NA	NA	18.3	18.4667	46.4	31.1	25.5	7.5	14.2
mono16	Kapentagyrus sefcae n. sp.	Odaxothrisssa losera		RMCA 1977.042.P.0004	Pool Malebo	42	31.4	20.8	6.3	10	29.8	10	26	9	17	18.2	18.8	NA	NA	20	NA	18.5	50	32.7	27.4	10.5	13.6
mono5	Kapentagyrus hahnin. sp.	Pellonula leonensis		NHM 1964.10.12.27	Agorkpo Creek	NA	NA	NA	NA	NA	NA	NA	18.3	5	NA	NA	13.37	16.03	16.77	11.75	NA	14.48	25.3	13.05	14.3	4.2	9.91
mono2	Kapentagyrus hahnin. sp.	Pellonula leonensis		NHM 1964.10.12.24	Agorkpo Creek	NA	NA	NA	NA	NA	18.5	NA	20.39	5.65	NA	NA	14.11	13.15	NA	NA	NA	13.63	29.31	18.78	17.5	4.7	7.1
mono7	Kapentagyrus hahnin. sp.	Pellonula leonensis		NHM 1964.10.12.29	Agorkpo Creek	NA	NA	NA	NA	NA	18.5	NA	18.02	5.89	NA	NA	17.03	NA	NA	14.35	NA	15.69	24.05	14.41	16.18	NA	6.8
mono3	Kapentagyrus verbisti n. sp.	Pellonula leonensis		RMCA 2000.048.P.1121	Lambaréné	36.7	26.4	12.8	4	11.7	25.9	6.9	NA	9.4	17	16.6	16.7	17.7	20.2	19.1	19.3	18.0857	NA	NA	NA	NA	NA
mono2	Kapentagyrus verbisti n. sp.	Pellonula leonensis		RMCA 2000.048.P.1121	Lambaréné	38.1	29.4	17.1	6.5	11.7	NA	NA	NA	NA	NA	NA	NA	NA	NA	NA	NA	20.1	36	27.5	21.9	6	9.3
mono1	Kapentagyrus verbisti n. sp.	Pellonula leonensis		RMCA 2000.048.P.1121	Lambaréné	38.4	27.9	17.5	7	9.7	27.3	6.6	NA	8.9	NA	NA	NA	NA	NA	NA	NA	20.35	37.8	28.5	21.9	5.2	10.4
mono1	Kapentagyrus hugei n. sp.	Pellonula leonensis		RMCA 1973.005.P.0373	Lake Volta	NA	NA	NA	NA	NA	NA	NA	16.4	5.2	12.3	NA	15.6	14.9	NA	NA	18.9	15.425	29.8	20.2	14.4	NA	8.6
mono2	Kapentagyrus hugei n. sp.	Pellonula leonensis		RMCA 1973.005.P.0373	Lake Volta	NA	NA	NA	NA	NA	NA	NA	13.5	5.5	12.1	NA	NA	17.3	16.3	NA	NA	15.2333	26.6	19.4	11.4	NA	8.1
mono3	Kapentagyrus hugei n. sp.	Pellonula leonensis		RMCA 1973.005.P.0373	Lake Volta	NA	NA	NA	NA	NA	NA	NA	18.4	4.6	16.3	NA	14.6	14.3	NA	NA	NA	15.0667	26.5	19.5	12.8	NA	7.6
mono4	Kapentagyrus hugei n. sp.	Pellonula leonensis		RMCA 1973.005.P.0373	Lake Volta	27.5	21.3	9.8	3.3	8.2	20	3.5	20.4	4.3	16.4	16.7	NA	15.3	17.3	NA	NA	16.425	27.5	21.7	13.1	4.1	NA
mono6	Kapentagyrus hugei n. sp.	Pellonula leonensis		RMCA 1973.005.P.0369	Lake Volta	29.5	24	9.8	5.1	8.2	21.5	4.2	20.2	7.8	NA	NA	14.9	19.3	17.5	17.3	18.3	17.46	29	22.6	14.5	3.4	8.5
mono8	Kapentagyrus hugei n. sp.	Pellonula leonensis		RMCA 1973.005.P.0369	Lake Volta	27.4	23.6	9.5	4.1	7.6	21.2	3.4	18.4	4.3	14	16	14.2	17.1	NA	NA	NA	15.325	28.5	24.1	12.3	3.6	7.7
mono9	Kapentagyrus hugei n. sp.	Pellonula leonensis		RMCA 1973.005.P.0369	Lake Volta	30	23.3	11.1	4.9	7	21.3	4.5	21.5	5.2	13.8	NA	NA	17.5	17.3	14.7	NA	15.825	29.9	20.4	15.7	4.8	9.3
mono1	Kapentagyrus hugei n. sp.	Pellonula leonensis		RMCA 1973.005.P.0367	Lake Volta	NA	NA	6.7	4.2	NA	NA	NA	18.6	6.9	15.6	NA	14.7	NA	14.9	NA	NA	15.0667	31.6	22.4	15.4	4.7	7.7
mono2	Kapentagyrus hugei n. sp.	Pellonula leonensis		RMCA 1973.005.P.0356	Lake Volta	27.9	25.1	8.9	4.9	9.2	19.6	5.2	14.5	5.8	15.4	NA	NA	18.3	18.1	17.4	15.1	16.86	27.6	25	13.4	4.8	8.8
mono3	Kapentagyrus hugei n. sp.	Pellonula leonensis		RMCA 1973.005.P.0369	Lake Volta	26	23.2	11.9	3.3	10.8	19.1	3.6	12.2	5.5	NA	NA	NA	NA	NA	NA	NA	NA	26.3	20.2	13.1	NA	8.3
mono1	Kapentagyrus hugei n. sp.	Pellonula leonensis		RMCA 1973.005.P.0369	Lake Volta	26.7	24	8.3	3.3	8.5	19	4.2	19.7	4.6	13.6	11.1	13.4	16	NA	NA	NA	13.525	28.6	23.4	12.3	3.9	7.9
mono4	Kapentagyrus hugei n. sp.	Pellonula leonensis		RMCA 1973.005.P.0369	Lake Volta	28.3	23	10.5	4.7	9.6	22.4	3.3	19.5	4.6	NA	15.4	15.7	14	18.6	18.8	NA	16.5	27.5	23.6	14.5	4.1	8.4
mono1	Kapentagyrus hugei n. sp.	Pellonula leonensis		RMCA 1973.005.P.0356	Lake Volta	26.2	24.3	9.6	3.6	7.5	NA	NA	18.3	4.1	15.9	NA	16.4	15.1	16.5	16.3	15.6	15.9667	24.5	21	15.9	4.5	7.1
mono7	Kapentagyrus hugei n. sp.	Pellonula leonensis		RMCA 1973.005.P.0369	Lake Volta	NA	NA	NA	NA	NA	18.9	4	20.6	4.9	14.6	NA	17.4	18.1	18.4	16.2	15	16.6167	27.5	22.1	15.3	NA	9
mono5	Kapentagyrus hugei n. sp.	Pellonula leonensis		RMCA 1973.005.P.0369	Lake Volta	28	22.8	11.4	5.3	9.1	21.2	5.4	22.9	5.9	NA	NA	NA	NA	NA	17.4	16.6	17	28.9	22.5	16.1	5	8.3
mono1	Kapentagyrus hugei n. sp.	Pellonula leonensis		RMCA 1973.005.P.0358	Lake Volta	NA	NA	NA	NA	NA	NA	NA	20.5	6.4	NA	NA	NA	NA	NA	NA	NA	NA	30.3	21.2	17.9	4.3	8.7
mono1	Kapentagyrus hugei n. sp.	Pellonula leonensis		RMCA 1973.005.P.0372	Lake Volta	28.2	22.2	13.9	6.6	8.8	20.5	5.4	21.9	6.2	15	17.5	NA	18.3	18.6	17.4	17.9	17.45	28	21.7	16.7	5.8	8.1
mono3	Kapentagyrus hugei n. sp.	Pellonula leonensis		RMCA 1973.005.P.0372	Lake Volta	30	22.1	12.8	5	10.1	18.9	NA	19.2	4.8	NA	16.6	16	19.2	17.4	17.7	17.7	17.4333	27	21.6	14.8	4.5	7.2
mono2	Kapentagyrus hugei n. sp.	Pellonula leonensis		RMCA 1973.005.P.0372	Lake Volta	28.5	22.2	10.8	NA	8.5	20.3	5.3	21.2	6	14.8	14	17.2	15.6	NA	NA	NA	15.4	27.4	20.9	14.6	NA	8.8
mono4	Kapentagyrus hugei n. sp.	Pellonula leonensis		RMCA 1973.005.P.0372	Lake Volta	28.2	21.6	13.1	NA	10.1	20.3	NA	21.6	5.7	16.2	NA	15.8	NA	NA	NA	NA	16	27.4	20.6	17.5	4.3	8.6
mono5	Kapentagyrus hugei n. sp.	Pellonula leonensis		RMCA 1973.005.P.0372	Lake Volta	29.2	22.9	12.8	5	8.5	NA	NA	19	6	NA	NA	NA	18.4	17.3	16.6	NA	17.4333	24.8	20.2	17	4.3	8.2
mono7	Kapentagyrus hugei n. sp.	Pellonula leonensis		RMCA 1973.005.P.0372	Lake Volta	27.4	22.3	12	3.5	9.7	19.8	4.3	18.8	6.1	15.7	16.3	NA	16.9	18.1	17.2	NA	16.84	24.3	23.5	16.3	NA	7.6
mono1	Kapentagyrus hugei n. sp.	Pellonula leonensis		RMCA 1973.005.P.0371	Lake Volta	NA	NA	NA	NA	NA	NA	NA	21.3	4.6	15.8	NA	NA	NA	NA	NA	NA	15.8	28.4	20.7	18.9	5.9	8.8
mono2	Kapentagyrus hugei n. sp.	Pellonula leonensis		RMCA 1973.005.P.0371	Lake Volta	26.5	22	NA	3.4	8.5	17.4	4.3	21.8	5.4	15.7	16.7	15.7	14.9	15.1	16.2	15.1	15.6286	26.3	21.5	15.6	4.9	8.9
mono1	Kapentagyrus hugei n. sp.	Pellonula leonensis		RMCA 1973.005.P.0363	Lake Volta	28.4	21.5	12.8	4.9	9.8	22.3	5	20	5.2	14.7	13.8	NA	NA	15.9	14.9	NA	14.825	28.5	22.9	16.2	6	9
mono1	Kapentagyrus hugei n. sp.	Pellonula leonensis		RMCA 1973.005.P.0361	Lake Volta	30.9	22.7	12.4	6.3	10	22.1	NA	21.2	5.9	15.5	16.3	16.3	18.8	19.7	18.6	NA	17.5333	27.3	22.1	17.4	5	9.2
mono2	Kapentagyrus hugei n. sp.	Pellonula leonensis		RMCA 1973.005.P.0361	Lake Volta	27.5	23.2	12.3	4.3	9.3	18.5	4.7	20.7	6	16.5	NA	16	16.8	17.1	15.5	16.6	16.4167	26	21	14.2	5.4	7.4
mono1	Kapentagyrus hugei n. sp.	Pellonula leonensis		RMCA 1973.005.P.0362	Lake Volta	28.9	22.8	13.4	4.8	9.5	19.4	5.1	21.4	6.6	15.6	17.3	16.7	NA	16.8	NA	17.9	16.86	26.1	21.4	14.6	4.9	8
mono1	Kapentagyrus hugei n. sp.	Pellonula leonensis		RMCA 1973.005.P.0368	Lake Volta	26.8	21.7	11.9	3.9	8.9	21.3	4.9	19.6	5.6	16.2	15.1	17.3	17.4	14.9	17.3	17.4	16.5143	27.1	20.4	16.3	5.2	9.4
mono1	Kapentagyrus hugei n. sp.	Pellonula leonensis		RMCA 1973.005.P.0365	Lake Volta	29.6	23.9	11.2	4.1	9.2	21.4	5	22.2	4.9	15.5	16.1	15.9	17.6	18.8	16.2	17.3	16.7714	30.8	22	15.6	3.8	9.4
mono1	Kapenntagyrus chochai n. sp.	Microthrissa moeruensis		RMCA 1994.019.P.2078	Kashilu	22.08	18.31	12.52	6.95	5.55	19.35	3.82	21.07	4.54	17.42	14.7	14.81	14.96	15.92	14	16.5	15.4729	27.98	21.13	16.34	8.07	7.95
mono1	Kapenntagyrus chochai n. sp.	Microthrissa moeruensis		RMCA 1994.019.P.2080	Kashilu	25.54	16.84	13.12	6.6	4.95	21	4.58	21.64	4.61	14.6	15.4	16.73	17.84	17.12	15.6	NA	16.215	28.86	19.63	17.53	8.37	9.22
mono1	Kapenntagyrus chochai n. sp.	Microthrissa moeruensis		RMCA 1993.145-0611	Lake Mweru	23.83	17.31	12.74	6.45	6.04	19.68	5.61	21.82	5.61	14.81	NA	15.81	13.45	13.4	20.16	22.48	16.685	NA	19.72	16.79	6.3	8.94
mono2	Kapenntagyrus chochai n. sp.	Microthrissa moeruensis		RMCA 1993.145-0611	Lake Mweru	23.41	18.89	14.92	6	4.95	17.66	4.75	20.9	8.9	18	16.1	17.3	16.8	17.6	17.4	15.3	16.9286	30.16	21.11	16.27	7.44	6.19
mono1	Kapenntagyrus chochai n. sp.	Microthrissa moeruensis		RMCA 1993.145-0620	Lake Mweru	25.1	19.4	11.1	6.22	6.41	20.35	6.55	19.36	5.87	13.46	13.17	16.06	16.67	15.55	15.43	16.09	15.2043	29.16	22.6	13.77	7.12	6.63
mono1	Kapenntagyrus chochai n. sp.	Microthrissa moeruensis		RMCA 1994.019.P.2064	Lake Mweru	24.13	17.56	12.14	5.81	5.92	23.9	4.36	17.23	4.8	15.12	13.1	NA	NA	NA	NA	NA	14.11	27.87	21.93	16.67	6.58	5.38
mono1	Kapenntagyrus chochai n. sp.	Microthrissa moeruensis		RMCA 1993.145-0614	Lake Mweru	22.01	17.78	12.03	5.24	6.08	18.82	6.31	NA	6.56	NA	NA	NA	NA	NA	NA	NA	NA	33.55	22.29	17.05	5.73	6.44
mono1	Kapentagyrus boegeri n. sp.	Microthrissa congica		NHM 1976.12.20.42-77	Lualaba River	NA	NA	NA	NA	NA	23.51	5.78	22.23	5.48	NA	NA	NA	NA	NA	NA	NA	16.775	23.34	15.08	16.18	7.05	7.3
mono14	Kapentagyrus boegeri n. sp.	Microthrissa congica		NHM 1976.12.20.42-77	Lualaba River	29.61	24.06	10.95	6.08	7.31	22.95	3.87	21.02	5.29	NA	NA	14.36	15.11	15.88	16.87	16.12	15.668	25.5	21.56	16.76	6.92	5.95
mono2	Kapentagyrus boegeri n. sp.	Microthrissa congica		NHM 1976.12.20.42-77	Lualaba River	22.5	16	11.5	3.6	8.04	25	NA	NA	3.4	NA	13.7	NA	13.3	13.8	NA	NA	13.6	24.2	19.3	16.3	4.6	NA
mono1	Kapenntagyrus janssensi n. sp.	Microthrissa congica		RMCA P.7826	Poko	26.4	17.9	17	5.2	5.9	20.89	5.52	21.6	4.66	15.76	NA	16.78	18.05	17.95	16.57	16.58	16.9483	25.61	20.59	17.07	7.42	5.53
mono2	Kapenntagyrus janssensi n. sp.	Microthrissa congica		RMCA P.7826	Poko	26.7	14.7	18.5	5.8	NA	16.84	5.19	20.23	6.59	12.68	NA	NA	NA	NA	15.52	15.08	14.4267	26.7	14	17.9	NA	9
mono1	Kapenntagyrus janssensi n. sp.	Microthrissa congica		RMCA P.7820	Mobi River	25.78	18.45	16.12	7.02	5.88	20.81	6.72	22.12	6.08	12.02	16	13.1	15.3	15.3	NA	NA	14.344	27.59	19.2	19.6	7.32	8.14
mono1	Kapenntagyrus janssensi n. sp.	Microthrissa congica		RMCA P.98130	Manyanga	20.42	17.85	13.44	3.54	3.96	19.03	5.63	NA	NA	14.21	16.07	NA	NA	NA	NA	NA	15.14	NA	NA	NA	NA	NA
mono1	Kapentagyrus rochetteae n. sp.	Microthrissa royauxi		RMCA 88001.P.0416	Pool Malebo	23.24	17.38	14.57	6.9	6.81	20.56	5	18.32	5.42	11.84	12.08	12.59	11.58	12.43	13.14	12.95	12.3729	27.97	19.39	20.27	6.7	7.95
mono1	Kapentagyrus rochetteae n. sp.	Microthrissa royauxi		RMCA 73022.P.0122	Pool Malebo	27.76	17.22	16.28	7.83	6.79	21.55	6	17.59	4.29	12.97	NA	11.9	13.2	10.6	14.35	15.09	13.0183	29.85	18.74	18.53	8.38	8.86
mono1	Kapentagyrus rochetteae n. sp.	Microthrissa royauxi		RMCA 73022.P.0121	Pool Malebo	24.05	18.52	15.71	6.91	5.29	23.3	5.83	19.4	5.89	11.27	10	14.2	NA	NA	NA	NA	11.8233	27.17	18.9	18.67	6.17	7.23
mono1	Kapentagyrus rochetteae n. sp.	Microthrissa royauxi		RMCA 73022.P.0129	Pool Malebo	27.79	20.28	16.3	5.6	7.4	23.48	5.78	19.3	6.5	13.9	10.6	11	11.7	14.3	13.1	NA	12.4333	25.14	18.13	18.35	7.9	6.87
mono1	Kapentagyrus rochetteae n. sp.	Microthrissa royauxi		RMCA 73022.P.0123	Pool Malebo	21.64	16.78	13.59	5.97	6.99	19.04	5.56	15.15	5.99	NA	NA	13.04	14.05	10.83	NA	NA	12.64	27.14	18.62	19.87	4.9	7.73
mono1	Kapentagyrus rochetteae n. sp.	Microthrissa royauxi		RMCA 73022.P.0131	Pool Malebo	25.55	17.45	16.27	5.84	7.05	16.32	4.11	19.8	5.14	11.89	NA	15.42	13.45	13.19	12.61	13.16	13.2867	27.64	18.46	21.2	4.68	6.47
mono2	Kapentagyrus rochetteae n. sp.	Microthrissa royauxi		RMCA 73022.P.0131	Pool Malebo	23	16.4	18.08	7.14	6.71	21.38	4.91	17.53	4.81	11.1	11.9	9.31	6.89	9.35	NA	NA	9.71	28.17	17.18	19.9	8.22	6.5
mono2	Kapentagyrus rochetteae n. sp.	Microthrissa royauxi		RMCA 88001.P.0417	Pool Malebo	24.27	16.48	14.06	5.74	7.05	18.45	4.81	16.29	5.05	12.84	11.5	10.68	10.37	11.42	NA	NA	11.362	28.09	16.77	19.6	8.29	6.38
mono2	Kapentagyrus rochetteae n. sp.	Microthrissa royauxi		RMCA 73022.P.0127	Pool Malebo	20.31	15.22	13.64	5.05	7.47	21.58	3.71	21.31	5.32	11.68	NA	11.29	11.89	11.33	13.25	13.5	12.1567	28.32	17.93	17.04	6.41	8.8
mono1	Kapentagyrus parisellei n. sp.	Nannothrissa parva		RMCA P.93619	Lake Tumba	22.22	17.3	12.38	7.5	4.84	22.1	4.94	20.88	4.75	14	13.8	15.1	13.4	15.2	15.4	NA	14.4833	25.28	17.63	18.36	7.46	5.4
mono1	Kapentagyrus parisellei n. sp.	Nannothrissa parva		RMCA P.93617	Lake Tumba	18.62	14.55	10.63	6.13	7.28	19.29	4.1	18.99	5.21	13.93	NA	NA	NA	NA	NA	NA	13.93	24.4	16.37	17.79	7.43	9.35
mono2	Kapentagyrus parisellei n. sp.	Nannothrissa parva		RMCA P.93618	Lake Tumba	19.74	16.47	13.5	7.28	6.09	22.15	5.63	19.05	4.25	14.4	13.7	14	NA	NA	14.5	15.1	14.34	22.22	18.36	16.61	5.08	7.52
mono1	Kapentagyrus parisellei n. sp.	Nannothrissa parva		RMCA P.93618	Lake Tumba	18.21	18.26	10.47	7.52	3.55	20.79	4.46	16.15	5.13	12.52	12.64	12.89	12.76	13.14	16.34	16.73	13.86	23.5	14.19	16.4	5.75	8.05
mono1	Kapentagyrus parisellei n. sp.	Nannothrissa parva		RMCA P.100648	Lake Tumba	21.1	17.9	NA	NA	4.9	21.6	3.5	19	4.9	15.1	NA	14.7	15	14.4	15.4	NA	14.92	23.6	17.7	NA	5.5	NA
mono2	Kapentagyrus parisellei n. sp.	Nannothrissa parva		RMCA P.100647	Lake Tumba	21.2	17	10.4	4.5	NA	21.5	6	17.3	5.8	12	NA	12.4	NA	13.4	10.8	13.2	12.36	24.3	NA	NA	NA	NA
mono1	Kapentagyrus parisellei n. sp.	Nannothrissa parva		RMCA P.100655	Lake Tumba	19.7	16.8	12.8	6.5	6	19	4.7	23.2	5.4	NA	NA	15.3	14.5	14.9	NA	NA	14.9	26.2	15.7	17	4	8.2
mono1	Kapentagyrus parisellei n. sp.	Nannothrissa parva		RMCA P.100646	Lake Tumba	20.5	15.3	11.2	4.2	7.8	23	4	17.4	5.5	12.2	NA	NA	14.6	14.1	13.3	NA	13.55	25.4	17.5	16.5	4.3	8.3
mono1	Kapentagyrus parisellei n. sp.	Nannothrissa parva		RMCA P.100652	Lake Tumba	18	13.5	13.5	5.9	NA	19	4.5	NA	NA	NA	NA	NA	NA	NA	NA	NA	NA	22.8	18	16.7	5.5	6.1
mono2	Kapentagyrus parisellei n. sp.	Nannothrissa parva		RMCA P.100652	Lake Tumba	20.1	17	11.3	4.6	7.5	21.3	5.3	19.1	3.6	15.3	NA	12.5	14	15.9	13.4	16.1	14.5333	24.8	17	16.6	3.7	7.7
mono1	Kapenntagyrus chochai n. sp.	Potamothrissa acutirostris		NHM 1920.5.26.3-12	Lake Mweru	22.7	18	11	5.5	NA	16.1	5	NA	NA	NA	NA	NA	NA	NA	NA	NA	17.725	23.6	18.5	14.5	6.1	7.2

## Sheet: MCO
Specimen ID	Parasite species	Host species	Accession number	Symbiotype/Symbioparatype	Locality	Copulatory tube axial length	Accessory piece axial length
mono1	Kapentagyrus vorelin. sp.	Odaxothrisssa ansorgii		RMCA A0-048-P-1260	Lake Nguene	28.96	35.07
mono1	Kapentagyrus vorelin. sp.	Odaxothrisssa ansorgii		RMCA A1-070-P-0266	Aboun, Noya River	37.9	42.62
mono1	Kapentagyrus vorelin. sp.	Odaxothrisssa ansorgii		RMCA A0-048-P-1252	Lake Nguene	28.96	36.21
mono1	Kapentagyrus vorelin. sp.	Odaxothrisssa ansorgii		RMCA A0-048-P-1255	Lake Nguene	36	37.22
mono2	Kapentagyrus vorelin. sp.	Odaxothrisssa ansorgii		RMCA A0-048-P-1255	Lake Nguene	33.46	36.59
mono2	Kapentagyrus vorelin. sp.	Odaxothrisssa ansorgii		RMCA A0-048-P-1252	Lake Nguene	NA	37.94
mono2	Kapentagyrus vorelin. sp.	Odaxothrisssa ansorgii		RMCA A0-048-P-1256	Lake Nguene	40.83	41.23
mono1	Kapentagyrus marispastoris n. sp.	Odaxothrissa mento		RMCA 1973.007.P.0019-1	Lake Volta	42.17	45.39
mono1	Kapentagyrus sefcae n. sp.	Odaxothrisssa losera		RMCA 1977.042.P.0004	Pool Malebo	43.47	41.66
mono2	Kapentagyrus sefcae n. sp.	Odaxothrisssa losera		RMCA 1977.042.P.0004	Pool Malebo	NA	42.98
mono4	Kapentagyrus sefcae n. sp.	Odaxothrisssa losera		RMCA 1977.042.P.0004	Pool Malebo	40.27	37.79
mono6	Kapentagyrus sefcae n. sp.	Odaxothrisssa losera		RMCA 1977.042.P.0004	Pool Malebo	39.91	NA
mono3	Kapentagyrus sefcae n. sp.	Odaxothrisssa losera		RMCA 1977.042.P.0003	Pool Malebo	39.6	46
mono1	Kapentagyrus sefcae n. sp.	Odaxothrisssa losera		RMCA 1977.042.P.0003	Pool Malebo	44.5	46.9
mono2	Kapentagyrus sefcae n. sp.	Odaxothrisssa losera		RMCA 1977.042.P.0003	Pool Malebo	38.9	47.8
mono8	Kapentagyrus sefcae n. sp.	Odaxothrisssa losera		RMCA 1977.042.P.0004	Pool Malebo	40	45.8
mono10	Kapentagyrus sefcae n. sp.	Odaxothrisssa losera		RMCA 1977.042.P.0004	Pool Malebo	35.5	48.5
mono11b	Kapentagyrus sefcae n. sp.	Odaxothrisssa losera		RMCA 1977.042.P.0004	Pool Malebo	42.3	44.6
mono12	Kapentagyrus sefcae n. sp.	Odaxothrisssa losera		RMCA 1977.042.P.0004	Pool Malebo	42	46.1
mono2	Kapentagyrus verbisti n. sp.	Pellonula leonensis		RMCA 2000.048.P.1121	Lambaréné	37.6	38.4
mono1	Kapentagyrus verbisti n. sp.	Pellonula leonensis		RMCA 2000.048.P.1121	Lambaréné	35.2	36.6
mono1	Kapentagyrus verbisti n. sp.	Pellonula leonensis		RMCA 2000.048.P.1120	Lambaréné	37.2	47.8
mono1	Kapentagyrus hugei n. sp.	Pellonula leonensis		RMCA 1973.005.P.0373	Lake Volta	26.5	27.4
mono4	Kapentagyrus hugei n. sp.	Pellonula leonensis		RMCA 1973.005.P.0373	Lake Volta	27	24.3
mono6	Kapentagyrus hugei n. sp.	Pellonula leonensis		RMCA 1973.005.P.0369	Lake Volta	28.8	31.3
mono8	Kapentagyrus hugei n. sp.	Pellonula leonensis		RMCA 1973.005.P.0369	Lake Volta	27.8	33.9
mono9	Kapentagyrus hugei n. sp.	Pellonula leonensis		RMCA 1973.005.P.0369	Lake Volta	28.3	30.8
mono2	Kapentagyrus hugei n. sp.	Pellonula leonensis		RMCA 1973.005.P.0356	Lake Volta	26.3	NA
mono3	Kapentagyrus hugei n. sp.	Pellonula leonensis		RMCA 1973.005.P.0369	Lake Volta	23.5	22.4
mono1	Kapentagyrus hugei n. sp.	Pellonula leonensis		RMCA 1973.005.P.0369	Lake Volta	28	34
mono4	Kapentagyrus hugei n. sp.	Pellonula leonensis		RMCA 1973.005.P.0369	Lake Volta	31.2	26
mono1	Kapentagyrus hugei n. sp.	Pellonula leonensis		RMCA 1973.005.P.0356	Lake Volta	29.4	28.3
mono7	Kapentagyrus hugei n. sp.	Pellonula leonensis		RMCA 1973.005.P.0369	Lake Volta	30.3	32.7
mono2	Kapentagyrus hugei n. sp.	Pellonula leonensis		RMCA 1973.005.P.0367	Lake Volta	29	31.4
mono1	Kapentagyrus hugei n. sp.	Pellonula leonensis		RMCA 1973.005.P.0372	Lake Volta	NA	31.4
mono4	Kapentagyrus hugei n. sp.	Pellonula leonensis		RMCA 1973.005.P.0372	Lake Volta	NA	30.5
mono5	Kapentagyrus hugei n. sp.	Pellonula leonensis		RMCA 1973.005.P.0372	Lake Volta	27.5	NA
mono6	Kapentagyrus hugei n. sp.	Pellonula leonensis		RMCA 1973.005.P.0372	Lake Volta	30.4	27
mono7	Kapentagyrus hugei n. sp.	Pellonula leonensis		RMCA 1973.005.P.0372	Lake Volta	30	31
mono1	Kapentagyrus hugei n. sp.	Pellonula leonensis		RMCA 1973.005.P.0371	Lake Volta	25.8	32.1
mono1	Kapentagyrus hugei n. sp.	Pellonula leonensis		RMCA 1973.005.P.0363	Lake Volta	28.1	28.1
mono1	Kapentagyrus hugei n. sp.	Pellonula leonensis		RMCA 1973.005.P.0366	Lake Volta	24	24.3
mono2	Kapentagyrus hugei n. sp.	Pellonula leonensis		RMCA 1973.005.P.0361	Lake Volta	29	24.2
mono1	Kapentagyrus hugei n. sp.	Pellonula leonensis		RMCA 1973.005.P.0362	Lake Volta	25.9	28.4
mono1	Kapentagyrus hugei n. sp.	Pellonula leonensis		RMCA 1973.005.P.0368	Lake Volta	24.7	31
mono1	Kapentagyrus hugei n. sp.	Pellonula leonensis		RMCA 1973.005.P.0365	Lake Volta	31.4	22.6
mono1	Kapenntagyrus chochai n. sp.	Microthrissa moeruensis		RMCA 1994.019.P.2078	Kashilu	33	28.8
mono1	Kapenntagyrus chochai n. sp.	Microthrissa moeruensis		RMCA 1994.019.P.2080	Kashilu	28.5	33.9
mono1	Kapenntagyrus chochai n. sp.	Microthrissa moeruensis		RMCA 1993.145-0611	Lake Mweru	24.95	32.59
mono2	Kapenntagyrus chochai n. sp.	Microthrissa moeruensis		RMCA 1993.145-0611	Lake Mweru	26.72	28.5
mono1	Kapenntagyrus chochai n. sp.	Microthrissa moeruensis		RMCA 1993.145-0620	Lake Mweru	29.68	34.18
mono1	Kapenntagyrus chochai n. sp.	Microthrissa moeruensis		RMCA 1994.019.P.2064	Lake Mweru	25.69	NA
mono1	Kapenntagyrus chochai n. sp.	Microthrissa moeruensis		RMCA 1993.145-0614	Lake Mweru	30.64	34.94
mono1	Kapentagyrus boegeri n. sp.	Microthrissa congica		NHM 1976.12.20.42-77	Lualaba River	41.3	41.9
mono14	Kapentagyrus boegeri n. sp.	Microthrissa congica		NHM 1976.12.20.42-77	Lualaba River	24.4	NA
mono2	Kapentagyrus boegeri n. sp.	Microthrissa congica		NHM 1976.12.20.42-77	Lualaba River	20.64	22.8
mono1	Kapenntagyrus janssensi n. sp.	Microthrissa congica		RMCA P.7826	Poko	23	26.6
mono2	Kapenntagyrus janssensi n. sp.	Microthrissa congica		RMCA P.7826	Poko	36.2	31.3
mono1	Kapenntagyrus janssensi n. sp.	Microthrissa congica		RMCA P.7820	Mobi River	35	43.21
mono1	Kapenntagyrus janssensi n. sp.	Microthrissa congica		RMCA P.98134	Manyanga	33.01	38.3
mono1	Kapentagyrus rochetteae n. sp.	Microthrissa royauxi		RMCA 88001.P.0416	Pool Malebo	38.3	38.7
mono1	Kapentagyrus rochetteae n. sp.	Microthrissa royauxi		RMCA 73022.P.0122	Pool Malebo	34.72	38.37
mono1	Kapentagyrus rochetteae n. sp.	Microthrissa royauxi		RMCA 73022.P.0121	Pool Malebo	27.4	34.78
mono1	Kapentagyrus rochetteae n. sp.	Microthrissa royauxi		RMCA 73022.P.0129	Pool Malebo	31.87	38.27
mono1	Kapentagyrus rochetteae n. sp.	Microthrissa royauxi		RMCA 73022.P.0123	Pool Malebo	31.98	34.95
mono1	Kapentagyrus rochetteae n. sp.	Microthrissa royauxi		RMCA 73022.P.0131	Pool Malebo	34.72	35.2
mono1	Kapentagyrus rochetteae n. sp.	Microthrissa royauxi		RMCA 73022.P.0127	Pool Malebo	33.6	32.83
mono1	Kapentagyrus rochetteae n. sp.	Microthrissa royauxi		RMCA 73022.P.0131	Pool Malebo	31.39	36.52
mono1	Kapentagyrus rochetteae n. sp.	Microthrissa royauxi		RMCA 88001.P.0417	Pool Malebo	31.28	34.11
mono2	Kapentagyrus rochetteae n. sp.	Microthrissa royauxi		RMCA 88001.P.0417	Pool Malebo	29.85	34.9
mono2	Kapentagyrus rochetteae n. sp.	Microthrissa royauxi		RMCA 73022.P.0127	Pool Malebo	34.43	38.17
mono2	Kapentagyrus parisellei n. sp.	Nannothrissa parva		RMCA P.93619	Lake Tumba	29.17	35.01
mono1	Kapentagyrus parisellei n. sp.	Nannothrissa parva		RMCA P.93619	Lake Tumba	29.7	36.1
mono1	Kapentagyrus parisellei n. sp.	Nannothrissa parva		RMCA P.93617	Lake Tumba	28.2	31.8
mono2	Kapentagyrus parisellei n. sp.	Nannothrissa parva		RMCA P.93618	Lake Tumba	36.88	35.94
mono1	Kapentagyrus parisellei n. sp.	Nannothrissa parva		RMCA P.93618	Lake Tumba	29.5	35.8
mono1	Kapentagyrus parisellei n. sp.	Nannothrissa parva		RMCA P.100648	Lake Tumba	31.2	36.2
mono1	Kapentagyrus parisellei n. sp.	Nannothrissa parva		RMCA P.100649	Lake Tumba	36.3	40.9
mono1	Kapentagyrus parisellei n. sp.	Nannothrissa parva		RMCA P.100655	Lake Tumba	30.8	35.5
mono1	Kapentagyrus parisellei n. sp.	Nannothrissa parva		RMCA P.100646	Lake Tumba	32.8	36.7
mono1	Kapentagyrus parisellei n. sp.	Nannothrissa parva		RMCA P.100652	Lake Tumba	34.4	35.1
mono2	Kapentagyrus parisellei n. sp.	Nannothrissa parva		RMCA P.100652	Lake Tumba	30.1	45.4
mono1	Kapentagyrus chochai n. sp.	Potamothrissa acutirostris		NHM 1920.5.26.3-12	Lake Mweru	32.7	35.35
